# Supplementary material for: Highly sensitive protein detection using enzyme-labeled gold nanoparticleprobes
Source: Royal Society of Chemistry journal article supplement (doi:10.1039/b916629g), 2009-12-11
Supplement: b916629g.pdf [file b916629g.pdf]

# Supplementary Information

## Highly Sensitive Protein Detection Using Enzyme-Labeled Gold Nanoparticle Probes

Meiying Liu<sup>a,b</sup>, Chunping Jia<sup>a\*</sup>, Yunyan Huang<sup>a</sup>, Xinhui Lou<sup>a</sup>, Shihua Yao<sup>c</sup>, Qinghui Jin<sup>a\*</sup>,  
Jianlong Zhao<sup>a\*</sup>, and Jiaqing Xiang<sup>c</sup>

<sup>a</sup>Shanghai Institute of Microsystem and Information Technology, Chinese Academy of Science, Shanghai 200050, P.R. China,

<sup>b</sup>Graduate School of the Chinese Academy of Sciences, Beijing 100049, P.R. China,

<sup>c</sup>Affiliated Cancer Hospital of Fudan University, Shanghai 200032, P.R. China

\* Corresponding authors. Phone: +86-21-62511070-8705(C.J.), +86-21-62511070-8703(Q.J.) +86-21-62511070-8702(J.Z.).

Fax: +86-21-62511070-8714(C.J., Q.J. and J.Z.).

E-mail: [jiachp@mail.sim.ac.cn](mailto:jiachp@mail.sim.ac.cn) (C.J.), [Jinqh@mail.sim.ac.cn](mailto:Jinqh@mail.sim.ac.cn) (Q.J.) [jlzhao@mail.sim.ac.cn](mailto:jlzhao@mail.sim.ac.cn) (J.Z.).

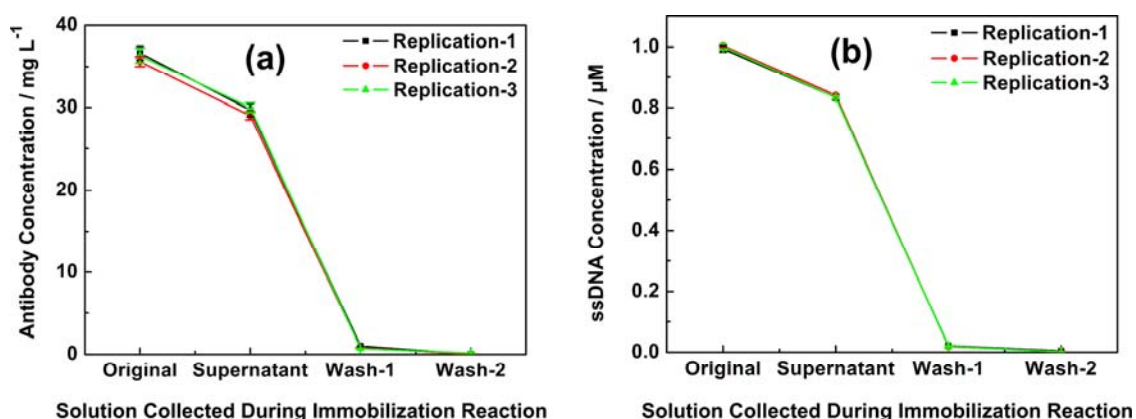

**Fig. S1** The concentrations of CEA detection antibody (a) and ssDNA (b) of the solution prepared before the immobilization reaction(original), after immobilization (supernatant) and the washing solutions (wash-1 to wash-2). The concentration of antibody in these solutions was determined via measuring UV/Vis absorbance at 280 nm. And the concentration of ssDNA in these solutions was measured based on the UV/Vis absorbance measurement at 260 nm. The amount of antibody and ssDNA bound onto the AuNPs was determined by comparing the amount in original and the amount in the supernatant and washing solutions. Based on these methods, the concentration of antibody and ssDNA bound onto the AuNPs was  $23.6 \pm 1$  nM and  $339 \pm 8$  nM, respectively.

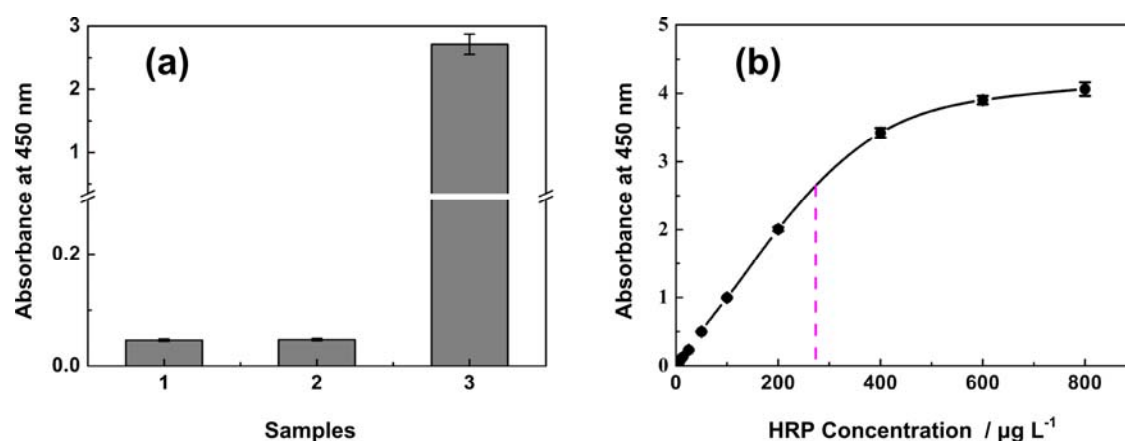

**Fig. S2 (a)** Colorimetric analysis for AuNPs and the enzyme-labeled AuNP probes. 2  $\mu\text{L}$  of AuNP solution and diluted AuNP probe dispersion were reacted with 100  $\mu\text{L}$  of HRP substrate TMB- $\text{H}_2\text{O}_2$  solution, respectively. After incubation for 15 min avoid of light, the mixture of AuNP probe dispersion and TMB- $\text{H}_2\text{O}_2$  solution turned dark green, while the mixture of AuNPs solution and TMB- $\text{H}_2\text{O}_2$  solution was colorless. The reactions were stopped by adding 100  $\mu\text{L}$  of 0.5 M sulfuric acid. The absorbance at 450 nm was measured with the microplate reader. **(1)** Blank control, **(2)** bare AuNPs, **(3)** enzyme-labeled AuNP probes. **(b)** Calibration curve for HRP of known concentrations. The concentrations of HRP were 0, 3.125, 6.25, 12.5, 25, 50, 100, 200, 400, 600, and 800  $\mu\text{g L}^{-1}$ . 2  $\mu\text{L}$  of various concentrations of HRP solution were separately incubated with 100  $\mu\text{L}$  of HRP substrate TMB- $\text{H}_2\text{O}_2$  solution for 15 min avoid of light at 37  $^\circ\text{C}$ . After stopping the reaction by adding 100  $\mu\text{L}$  of 0.5 M sulfuric acid, the absorbance at 450 nm was measured with the microplate reader. To determine the amount of active HRP on each AuNP probe, the value of the absorbance produced by the AuNP probes dispersion was compared to the calibration curve of HRP. Based on this analysis, the concentration of active HRP in the stock AuNP probe dispersion was  $703 \pm 21$  nM.
